# Supplementary material
Source: HighWire-hosted journal article supplement (https://erj.ersjournals.com/content/58/1/2100203)
Supplement: inline-supplementary-material-1 [file inline-supplementary-material-1.pdf]

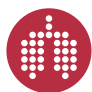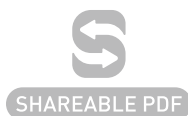

# The dawn of the omics era in human precision-cut lung slices

John Stegmayr <sup>1,2,3</sup> and Darcy E. Wagner <sup>1,2,3</sup>

<sup>1</sup>Dept of Experimental Medical Sciences, Lund University, Lund, Sweden. <sup>2</sup>Wallenberg Centre for Molecular Medicine, Lund University, Lund, Sweden. <sup>3</sup>Stem Cell Center, Faculty of Medicine, Lund University, Lund, Sweden.

Corresponding author: Darcy E. Wagner ([darcy.wagner@med.lu.se](mailto:darcy.wagner@med.lu.se))

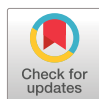

Shareable abstract (@ERSpublications)

**New techniques permit the use of multiple omics and advanced imaging technologies with human precision-cut lung slices (PCLS) to allow for more objective and comprehensive molecular analysis to bring PCLS closer to the era of precision medicine** <https://bit.ly/3deBjx2>

**Cite this article as:** Stegmayr J, Wagner DE. The dawn of the omics era in human precision-cut lung slices. *Eur Respir J* 2021; 58: 2100203 [DOI: 10.1183/13993003.00203-2021].

This single-page version can be shared freely online.

Copyright ©The authors 2021. For reproduction rights and permissions contact [permissions@ersnet.org](mailto:permissions@ersnet.org)

Received: 23 Jan 2021  
Accepted: 8 Feb 2021

Precision-cut lung slices (PCLS) have been used in biomedical research for over 50 years (30 years for human PCLS), but the majority of initial work focused on toxicology, tissue mechanics, and modelling airway responses for asthma [1–3]. In recent years, PCLS have been increasingly used for studying acute and chronic lung diseases at the molecular level, as well as for evaluating therapeutics [3, 4]. In particular, there is high interest in using PCLS derived from human lungs, due to the ability to directly study species-specific effects in human tissue and because they better capture clinical heterogeneity (*e.g.* age, broader spectrum of disease status, or the presence of other co-morbidities). However, one of the major difficulties hampering the further use of this model system has been due to difficulties in directly applying new and emerging state-of-the-art analysis methods to PCLS, including for example mass spectrometry, next-generation sequencing, and advanced microscopy. The study by KHAN *et al.* [5] in this issue of the *European Respiratory Journal* details multiple technical advances and makes a significant leap forward in our ability to perform advanced and detailed molecular analysis of human PCLS-based disease models.
